# Supplementary material for: Relationship of HER2 Alteration and Microsatellite Instability Status in Colorectal Adenocarcinoma
Source: PubMed Central journal article supplement — Oncologist. 2021 May 4;26(7):e1161–70. doi: 10.1002/onco.13786 (PMC8265359; doi:10.1002/onco.13786), 2021-05-04
Supplement: ONCO-26-e1161-s001.pdf [file ONCO-26-e1161-s001.pdf]

Supplemental Tables for:  
Relationship of HER2 alteration and MSI status in colorectal adenocarcinoma  
Qiu Miaozhen et al.

**Table S1: Comparison of SNV and indel**

Comparison of snv and indel between MSI-H patients with and without HER2 mutation

| Type  | HER2 mutation | Frequency | Without HER2 mutation | Frequency | P value  |
|-------|---------------|-----------|-----------------------|-----------|----------|
| snv   | 1314          | 0.833756  | 2262                  | 0.7845994 | 9.69E-05 |
| indel | 259           | 0.16434   | 619                   | 0.2147069 | 6.24E-05 |

**Table S2: Gene list for 295 genes**

|          |
|----------|
| ABL1     |
| AKT1     |
| AKT2     |
| AKT3     |
| ALK      |
| ALOX12B  |
| AMER1    |
| APC      |
| APCDD1   |
| AR       |
| ARAF     |
| ARFRP1   |
| ARID1A   |
| ARID2    |
| ASXL1    |
| ATM      |
| ATR      |
| ATRX     |
| AURKA    |
| AURKB    |
| AXL      |
| BACH1    |
| BAP1     |
| BARD1    |
| BCL2     |
| BCL2L2   |
| BCL6     |
| BCOR     |
| BCORL1   |
| BCR      |
| BLM      |
| BRAF     |
| BRCA1    |
| BRCA2    |
| BRIP1    |
| BTG1     |
| BTK      |
| C11ORF30 |

|         |
|---------|
| CARD11  |
| CASP8   |
| CBFB    |
| CBL     |
| CCND1   |
| CCND2   |
| CCND3   |
| CCNE1   |
| CD79A   |
| CD79B   |
| CDC73   |
| CDH1    |
| CDK12   |
| CDK4    |
| CDK6    |
| CDK8    |
| CDKN1B  |
| CDKN2A  |
| CDKN2B  |
| CDKN2C  |
| CEBPA   |
| CHEK1   |
| CHEK2   |
| CHUK    |
| CIC     |
| CRBN    |
| CREBBP  |
| CRKL    |
| CRLF2   |
| CSF1R   |
| CTCF    |
| CTNNA1  |
| CTNNB1  |
| CUL4A   |
| CUL4B   |
| CYP17A1 |
| DAXX    |
| DDR2    |
| DIS3    |
| DNMT3A  |

|        |
|--------|
| DOT1L  |
| EGFR   |
| EP300  |
| EPHA3  |
| EPHA5  |
| EPHB1  |
| ERBB2  |
| ERBB3  |
| ERBB4  |
| ERG    |
| ESR1   |
| ETV1   |
| ETV4   |
| ETV5   |
| ETV6   |
| EWSR1  |
| EZH2   |
| FAM46C |
| FANCA  |
| FANCC  |
| FANCD2 |
| FANCE  |
| FANCF  |
| FANCG  |
| FANCI  |
| FANCL  |
| FANCM  |
| FAT3   |
| FBXW7  |
| FGF10  |
| FGF12  |
| FGF14  |
| FGF19  |
| FGF23  |
| FGF3   |
| FGF4   |
| FGF6   |
| FGF7   |
| FGFR1  |
| FGFR2  |

|        |
|--------|
| FGFR3  |
| FGFR4  |
| FLT1   |
| FLT3   |
| FLT4   |
| FOXL2  |
| GATA1  |
| GATA2  |
| GATA3  |
| GID4   |
| GNA11  |
| GNA13  |
| GNAQ   |
| GNAS   |
| GPR124 |
| GRIN2A |
| GSK3B  |
| HGF    |
| HLA-A  |
| HRAS   |
| IDH1   |
| IDH2   |
| IGF1   |
| IGF1R  |
| IGF2   |
| IKBKE  |
| IKZF1  |
| IL7R   |
| INHBA  |
| IRF4   |
| IRS2   |
| JAK1   |
| JAK2   |
| JAK3   |
| JUN    |
| KAT6A  |
| KDM5A  |
| KDM5C  |
| KDM6A  |
| KDR    |

|         |
|---------|
| KEAP1   |
| KIT     |
| KLHL6   |
| KMT2A   |
| KMT2D   |
| KRAS    |
| LMO1    |
| LRP1B   |
| MAP2K1  |
| MAP2K2  |
| MAP2K4  |
| MAP3K1  |
| MAP3K13 |
| MCL1    |
| MDM2    |
| MDM4    |
| MED12   |
| MEF2B   |
| MEN1    |
| MET     |
| MITF    |
| MLH1    |
| MPL     |
| MRE11A  |
| MSH2    |
| MSH6    |
| MTOR    |
| MUTYH   |
| MYC     |
| MYCL1   |
| MYCN    |
| MYD88   |
| NBN     |
| NCOR1   |
| NF1     |
| NF2     |
| NFE2L2  |
| NFKBIA  |
| NKX2-1  |
| NOTCH1  |

|         |
|---------|
| NOTCH2  |
| NOTCH3  |
| NOTCH4  |
| NPM1    |
| NRAS    |
| NSD1    |
| NTRK1   |
| NTRK2   |
| NTRK3   |
| NUP93   |
| PAK3    |
| PAK7    |
| PALB2   |
| PARP1   |
| PARP2   |
| PARP3   |
| PARP4   |
| PAX5    |
| PBRM1   |
| PDGFRA  |
| PDGFRB  |
| PDK1    |
| PIK3C2G |
| PIK3C3  |
| PIK3CA  |
| PIK3CG  |
| PIK3R1  |
| PIK3R2  |
| PMS2    |
| PNRC1   |
| PPP2R1A |
| PRDM1   |
| PRKAR1A |
| PRKDC   |
| PRSS8   |
| PTCH1   |
| PTEN    |
| PTPN11  |
| RAD50   |
| RAD51   |

|         |
|---------|
| RAD51B  |
| RAD51C  |
| RAD51D  |
| RAD52   |
| RAD54L  |
| RAF1    |
| RARA    |
| RB1     |
| REL     |
| RET     |
| RICTOR  |
| RNF43   |
| RPA1    |
| RPTOR   |
| ROS1    |
| RUNX1   |
| RUNX1T1 |
| SETD2   |
| SF3B1   |
| SH2B3   |
| SMAD2   |
| SMAD4   |
| SMARCA4 |
| SMARCB1 |
| SMARCD1 |
| SMO     |
| SOCS1   |
| SOX10   |
| SOX2    |
| SPEN    |
| SPOP    |
| SRC     |
| STAG2   |
| STAT4   |
| STK11   |
| SUFU    |
| SYK     |
| TBX3    |
| TET2    |
| TGFBR2  |



|          |
|----------|
| TIPARP   |
| TMPRSS2  |
| TNFAIP3  |
| TNFRSF14 |
| TOP1     |
| TP53     |
| TRRAP    |
| TSC1     |
| TSC2     |
| TSHR     |
| VHL      |
| WISP3    |
| WT1      |
| XPO1     |
| XRCC3    |
| ZNF217   |
| ZNF703   |

**Table S3: Gene list for 1021 genes**

|               |               |               |                |               |                 |               |                |                |                 |
|---------------|---------------|---------------|----------------|---------------|-----------------|---------------|----------------|----------------|-----------------|
| <i>ABL1</i>   | <i>ACVR1B</i> | <i>AKT1</i>   | <i>AKT2</i>    | <i>AKT3</i>   | <i>ALK</i>      | <i>APC</i>    | <i>AR</i>      | <i>ARAF</i>    | <i>ARID1A</i>   |
| <i>ARID1B</i> | <i>ARID2</i>  | <i>ASXL1</i>  | <i>ATM</i>     | <i>ATR</i>    | <i>ATRX</i>     | <i>AURKA</i>  | <i>AURKB</i>   | <i>AXIN1</i>   | <i>AXIN2</i>    |
| <i>AXL</i>    | <i>B2M</i>    | <i>BAP1</i>   | <i>BARD1</i>   | <i>BCL2</i>   | <i>BCL2L1</i>   | <i>BCOR</i>   | <i>BLM</i>     | <i>BMPR1A</i>  | <i>BRAF</i>     |
| <i>BRCA1</i>  | <i>BRCA2</i>  | <i>BRD4</i>   | <i>BRIP1</i>   | <i>BTK</i>    | <i>CARD11</i>   | <i>CASP8</i>  | <i>CBFB</i>    | <i>CBL</i>     | <i>CCND1</i>    |
| <i>CCND2</i>  | <i>CCND3</i>  | <i>CCNE1</i>  | <i>CD274</i>   | <i>CDC73</i>  | <i>CDH1</i>     | <i>CDK12</i>  | <i>CDK4</i>    | <i>CDK6</i>    | <i>CDK8</i>     |
| <i>CDKN1A</i> | <i>CDKN1B</i> | <i>CDKN2A</i> | <i>CDKN2B</i>  | <i>CDKN2C</i> | <i>CEBPA</i>    | <i>CHEK1</i>  | <i>CHEK2</i>   | <i>CIC</i>     | <i>CREBBP</i>   |
| <i>CRKL</i>   | <i>CSF1R</i>  | <i>CTCF</i>   | <i>CTNNA1</i>  | <i>CTNNB1</i> | <i>CUL3</i>     | <i>CYLD</i>   | <i>DAXX</i>    | <i>DDR1</i>    | <i>DDR2</i>     |
| <i>DICER1</i> | <i>DNMT3A</i> | <i>DOT1L</i>  | <i>EGFR</i>    | <i>EIF1AX</i> | <i>C11orf30</i> | <i>EP300</i>  | <i>EPAS1</i>   | <i>EPCAM</i>   | <i>EPHA2</i>    |
| <i>EPHA3</i>  | <i>EPHA5</i>  | <i>EPHB1</i>  | <i>EPHB6</i>   | <i>ERBB2</i>  | <i>ERBB3</i>    | <i>ERBB4</i>  | <i>ERCC1</i>   | <i>ERCC3</i>   | <i>ERCC4</i>    |
| <i>ERCC5</i>  | <i>ERG</i>    | <i>ERRF1</i>  | <i>ESR1</i>    | <i>EXT1</i>   | <i>EXT2</i>     | <i>EZH2</i>   | <i>FAM123B</i> | <i>FAM175A</i> | <i>FANCA</i>    |
| <i>FANCC</i>  | <i>FANCD2</i> | <i>FANCE</i>  | <i>FANCF</i>   | <i>FANCG</i>  | <i>FANCL</i>    | <i>FANCM</i>  | <i>FAS</i>     | <i>FAT1</i>    | <i>FAT2</i>     |
| <i>FBXW7</i>  | <i>FGF19</i>  | <i>FGF3</i>   | <i>FGF4</i>    | <i>FGFR1</i>  | <i>FGFR2</i>    | <i>FGFR3</i>  | <i>FGFR4</i>   | <i>FH</i>      | <i>FLCN</i>     |
| <i>FLT1</i>   | <i>FLT3</i>   | <i>FLT4</i>   | <i>FOXA1</i>   | <i>FOXL2</i>  | <i>FOXP1</i>    | <i>FUBP1</i>  | <i>GALNT12</i> | <i>GATA3</i>   | <i>GNA11</i>    |
| <i>GNAQ</i>   | <i>GNAS</i>   | <i>GRIN2A</i> | <i>GRM3</i>    | <i>HDAC1</i>  | <i>HGF</i>      | <i>HNF1A</i>  | <i>HOXB13</i>  | <i>HRAS</i>    | <i>IDH1</i>     |
| <i>IDH2</i>   | <i>IFNG</i>   | <i>IFNGR1</i> | <i>IGF1R</i>   | <i>IKBKE</i>  | <i>IKZF1</i>    | <i>IL7R</i>   | <i>INPP4B</i>  | <i>IRF2</i>    | <i>IRS2</i>     |
| <i>JAK1</i>   | <i>JAK2</i>   | <i>JAK3</i>   | <i>JUN</i>     | <i>KDM5A</i>  | <i>KDM5C</i>    | <i>KDM6A</i>  | <i>KDR</i>     | <i>KEAP1</i>   | <i>KIT</i>      |
| <i>KRAS</i>   | <i>LRP1B</i>  | <i>MAF</i>    | <i>MAP2K1</i>  | <i>MAP2K2</i> | <i>MAP2K4</i>   | <i>MAP3K1</i> | <i>MAPK1</i>   | <i>MAX</i>     | <i>MCL1</i>     |
| <i>MDM2</i>   | <i>MDM4</i>   | <i>MED12</i>  | <i>MEF2B</i>   | <i>MEN1</i>   | <i>MET</i>      | <i>MITF</i>   | <i>MLH1</i>    | <i>MLH3</i>    | <i>MLL</i>      |
| <i>MLL2</i>   | <i>MLL3</i>   | <i>MPL</i>    | <i>MRE11A</i>  | <i>MS4A1</i>  | <i>MSH2</i>     | <i>MSH3</i>   | <i>MSH6</i>    | <i>MST1R</i>   | <i>MTOR</i>     |
| <i>MUTYH</i>  | <i>MYC</i>    | <i>MYCL1</i>  | <i>MYCN</i>    | <i>MYD88</i>  | <i>NBN</i>      | <i>NCOR1</i>  | <i>NF1</i>     | <i>NF2</i>     | <i>NFE2L2</i>   |
| <i>NFKBIA</i> | <i>NKX2-1</i> | <i>NOTCH1</i> | <i>NOTCH2</i>  | <i>NOTCH3</i> | <i>NPM1</i>     | <i>NRAS</i>   | <i>NSD1</i>    | <i>NTHL1</i>   | <i>NTRK1</i>    |
| <i>NTRK2</i>  | <i>NTRK3</i>  | <i>PALB2</i>  | <i>PARK2</i>   | <i>PARP1</i>  | <i>PAX5</i>     | <i>PBRM1</i>  | <i>PCK1</i>    | <i>PDCD1</i>   | <i>PDCD1LG2</i> |
| <i>PDGFRA</i> | <i>PDGFRB</i> | <i>PDK1</i>   | <i>PIK3CA</i>  | <i>PIK3CB</i> | <i>PIK3CG</i>   | <i>PIK3R1</i> | <i>PIK3R2</i>  | <i>PMS1</i>    | <i>PMS2</i>     |
| <i>POLD1</i>  | <i>POLE</i>   | <i>POT1</i>   | <i>PPP2R1A</i> | <i>PRDM1</i>  | <i>PRKAR1A</i>  | <i>PTCH1</i>  | <i>PTCH2</i>   | <i>PTEN</i>    | <i>PTPN11</i>   |

|                  |                  |                  |                  |                  |                  |                  |                 |                  |                  |
|------------------|------------------|------------------|------------------|------------------|------------------|------------------|-----------------|------------------|------------------|
| <i>PTPRD</i>     | <i>RAC1</i>      | <i>RAD50</i>     | <i>RAD51</i>     | <i>RAD51B</i>    | <i>RAD51C</i>    | <i>RAD51D</i>    | <i>RAD52</i>    | <i>RAD54L</i>    | <i>RAF1</i>      |
| <i>RARA</i>      | <i>RB1</i>       | <i>RBM10</i>     | <i>RECQL</i>     | <i>RECQL4</i>    | <i>RET</i>       | <i>RHOA</i>      | <i>RICTOR</i>   | <i>RINT1</i>     | <i>RNF43</i>     |
| <i>ROS1</i>      | <i>RPTOR</i>     | <i>RUNX1</i>     | <i>SDHA</i>      | <i>SDHAF2</i>    | <i>SDHB</i>      | <i>SDHC</i>      | <i>SDHD</i>     | <i>SERPINB3</i>  | <i>SERPINB4</i>  |
| <i>SETD2</i>     | <i>SF3B1</i>     | <i>SLX4</i>      | <i>SMAD2</i>     | <i>SMAD3</i>     | <i>SMAD4</i>     | <i>SMARCA4</i>   | <i>SMARCB1</i>  | <i>SMO</i>       | <i>SOCS1</i>     |
| <i>SOX2</i>      | <i>SOX9</i>      | <i>SPOP</i>      | <i>SRC</i>       | <i>STAG2</i>     | <i>STAT3</i>     | <i>STK11</i>     | <i>SUFU</i>     | <i>SYK</i>       | <i>TBX3</i>      |
| <i>TCF7L2</i>    | <i>TERC</i>      | <i>TET2</i>      | <i>TGFBR2</i>    | <i>TMEM127</i>   | <i>TMPRSS2</i>   | <i>TNFAIP3</i>   | <i>TNFRSF14</i> | <i>TOP1</i>      | <i>TOP2A</i>     |
| <i>TP53</i>      | <i>TSC1</i>      | <i>TSC2</i>      | <i>TSHR</i>      | <i>U2AF1</i>     | <i>VEGFA</i>     | <i>VHL</i>       | <i>WRN</i>      | <i>WT1</i>       | <i>XPO1</i>      |
| <i>ABCA13</i>    | <i>ABCB1</i>     | <i>ABCC1</i>     | <i>ABCC11</i>    | <i>ABCC2</i>     | <i>ABCG2</i>     | <i>ABL2</i>      | <i>ACACA</i>    | <i>ACIN1</i>     | <i>ACTB</i>      |
| <i>ACTG1</i>     | <i>ACTG2</i>     | <i>ACVR2A</i>    | <i>ACVRL1</i>    | <i>ADAM29</i>    | <i>ADAMTS5</i>   | <i>ADCY1</i>     | <i>AFF1</i>     | <i>AFF2</i>      | <i>AFF3</i>      |
| <i>AHNAK</i>     | <i>AKAP9</i>     | <i>ALB</i>       | <i>AMOT</i>      | <i>ANGPT1</i>    | <i>ANK3</i>      | <i>ANKRD11</i>   | <i>ANKRD30A</i> | <i>ANKRD30B</i>  | <i>APEX1</i>     |
| <i>APOBEC3B</i>  | <i>ARAP3</i>     | <i>ARFGEF1</i>   | <i>ARFGEF2</i>   | <i>ARHGAP29</i>  | <i>ARHGAP35</i>  | <i>ARID4B</i>    | <i>ARID5B</i>   | <i>ARNT</i>      | <i>ASCL4</i>     |
| <i>ASH1L</i>     | <i>ASMTL</i>     | <i>ASPM</i>      | <i>ASTN1</i>     | <i>ASXL2</i>     | <i>ATIC</i>      | <i>ATP11B</i>    | <i>ATP12A</i>   | <i>ATP1A1</i>    | <i>ATP2B3</i>    |
| <i>BAZ2B</i>     | <i>BBC3</i>      | <i>BBS9</i>      | <i>BCAS1</i>     | <i>BCL10</i>     | <i>BCL11A</i>    | <i>BCL11B</i>    | <i>BCL2A1</i>   | <i>BCL2L11</i>   | <i>BCL3</i>      |
| <i>BCL6</i>      | <i>BCL9</i>      | <i>BCORL1</i>    | <i>BCR</i>       | <i>BIRC3</i>     | <i>BMPR2</i>     | <i>BNC2</i>      | <i>BPTF</i>     | <i>BRD2</i>      | <i>BRD3</i>      |
| <i>BRSK1</i>     | <i>BRWD1</i>     | <i>BTLA</i>      | <i>BUB1</i>      | <i>C15orf23</i>  | <i>C15orf55</i>  | <i>C1QA</i>      | <i>C15</i>      | <i>C3orf70</i>   | <i>C7orf53</i>   |
| <i>C8orf34</i>   | <i>CACNA1E</i>   | <i>CADM2</i>     | <i>CALR</i>      | <i>CAMTA1</i>    | <i>CASP1</i>     | <i>CASQ2</i>     | <i>CBLB</i>     | <i>CBR1</i>      | <i>CBR3</i>      |
| <i>CCDC168</i>   | <i>CCNA1</i>     | <i>CCNB3</i>     | <i>CCT3</i>      | <i>CCT5</i>      | <i>CCT6B</i>     | <i>CD22</i>      | <i>CD33</i>     | <i>CD5L</i>      | <i>CD74</i>      |
| <i>CDA</i>       | <i>CDH11</i>     | <i>CDH18</i>     | <i>CDH23</i>     | <i>CDK13</i>     | <i>CHD1</i>      | <i>CHD1L</i>     | <i>CHD4</i>     | <i>CHD6</i>      | <i>CHD8</i>      |
| <i>CHD9</i>      | <i>CHFR</i>      | <i>CHI3L1</i>    | <i>CHN1</i>      | <i>CIITA</i>     | <i>CLDN18</i>    | <i>CLP1</i>      | <i>CLSPN</i>    | <i>CLTC</i>      | <i>CNOT3</i>     |
| <i>CNOT4</i>     | <i>CNTN1</i>     | <i>CNTN5</i>     | <i>CNTNAP1</i>   | <i>CNTNAP5</i>   | <i>COL1A1</i>    | <i>COL2A1</i>    | <i>COL5A1</i>   | <i>COL5A2</i>    | <i>COL5A3</i>    |
| <i>COPS2</i>     | <i>CPS1</i>      | <i>CRIPAK</i>    | <i>CRLF2</i>     | <i>CRNKL1</i>    | <i>CRTC1</i>     | <i>CSF1</i>      | <i>CSF3R</i>    | <i>CSMD1</i>     | <i>CSMD3</i>     |
| <i>CSNK1A1</i>   | <i>CSNK1G3</i>   | <i>CTLA4</i>     | <i>CTNNA2</i>    | <i>CTNND1</i>    | <i>CUX1</i>      | <i>CXCR4</i>     | <i>CYBA</i>     | <i>CYP19A1</i>   | <i>CYP1A1</i>    |
| <i>CYP1B1</i>    | <i>CYP2A13</i>   | <i>CYP2C8</i>    | <i>CYP2D6</i>    | <i>CYP3A4</i>    | <i>CYP3A5</i>    | <i>DCC</i>       | <i>DDX3X</i>    | <i>DDX5</i>      | <i>DEK</i>       |
| <i>DHX35</i>     | <i>DHX9</i>      | <i>DIAPH1</i>    | <i>DIS3L2</i>    | <i>DLC1</i>      | <i>DMD</i>       | <i>DNAH6</i>     | <i>DNAJB1</i>   | <i>DNM2</i>      | <i>DNMT1</i>     |
| <i>DNMT3B</i>    | <i>DOCK2</i>     | <i>DOCK7</i>     | <i>DPYD</i>      | <i>DRGX</i>      | <i>DTX1</i>      | <i>DUSP22</i>    | <i>DYSF</i>     | <i>E2F3</i>      | <i>EBF1</i>      |
| <i>ECT2L</i>     | <i>EED</i>       | <i>EEF1A1</i>    | <i>EGFL7</i>     | <i>EGR3</i>      | <i>EIF2AK3</i>   | <i>EIF2C3</i>    | <i>EIF3A</i>    | <i>EIF4A2</i>    | <i>EIF4G3</i>    |
| <i>ELAC2</i>     | <i>ELF1</i>      | <i>ELF3</i>      | <i>ELMO1</i>     | <i>ELN</i>       | <i>EME2</i>      | <i>EMID2</i>     | <i>EML4</i>     | <i>EPC1</i>      | <i>EPHA1</i>     |
| <i>EPHA4</i>     | <i>EPHA7</i>     | <i>EPHB2</i>     | <i>EPHB4</i>     | <i>EPOR</i>      | <i>EPPK1</i>     | <i>EPS15</i>     | <i>ERBB2IP</i>  | <i>ERCC2</i>     | <i>ESR2</i>      |
| <i>ETS1</i>      | <i>ETV1</i>      | <i>ETV5</i>      | <i>ETV6</i>      | <i>EWSR1</i>     | <i>EZR</i>       | <i>F8</i>        | <i>FAM131B</i>  | <i>FAM135B</i>   | <i>FAM157B</i>   |
| <i>FAM46C</i>    | <i>FAM5C</i>     | <i>FAP</i>       | <i>FASLG</i>     | <i>FAT3</i>      | <i>FAT4</i>      | <i>FCGR1A</i>    | <i>FCGR2A</i>   | <i>FCGR2B</i>    | <i>FCGR3A</i>    |
| <i>FCRL4</i>     | <i>FGF10</i>     | <i>FGF12</i>     | <i>FGF14</i>     | <i>FGF23</i>     | <i>FGF6</i>      | <i>FLG</i>       | <i>FLI1</i>     | <i>FLNC</i>      | <i>FMN2</i>      |
| <i>FN1</i>       | <i>FNDC4</i>     | <i>FOXA2</i>     | <i>FOXO1</i>     | <i>FOXO3</i>     | <i>FOXQ1</i>     | <i>FRMPD4</i>    | <i>FUS</i>      | <i>FXR1</i>      | <i>FYN</i>       |
| <i>FZD1</i>      | <i>G3BP1</i>     | <i>G3BP2</i>     | <i>GAB2</i>      | <i>GABRA6</i>    | <i>GATA1</i>     | <i>GATA2</i>     | <i>GFRAL</i>    | <i>GIGYF1</i>    | <i>GKN2</i>      |
| <i>GLB1L3</i>    | <i>GLI1</i>      | <i>GLI2</i>      | <i>GLI3</i>      | <i>GMPS</i>      | <i>GNA13</i>     | <i>GNG2</i>      | <i>GPC3</i>     | <i>GPR124</i>    | <i>GPS2</i>      |
| <i>GPX1</i>      | <i>GRB7</i>      | <i>GSK3B</i>     | <i>GSTM5</i>     | <i>GSTP1</i>     | <i>GUSB</i>      | <i>H3F3A</i>     | <i>H3F3B</i>    | <i>H3F3C</i>     | <i>HCLS1</i>     |
| <i>HCN1</i>      | <i>HDAC4</i>     | <i>HDAC9</i>     | <i>HECW1</i>     | <i>HEY1</i>      | <i>HIST1H1C</i>  | <i>HIST1H1D</i>  | <i>HIST1H1E</i> | <i>HIST1H2AC</i> | <i>HIST1H2AG</i> |
| <i>HIST1H2AL</i> | <i>HIST1H2AM</i> | <i>HIST1H2BC</i> | <i>HIST1H2BD</i> | <i>HIST1H2BJ</i> | <i>HIST1H2BK</i> | <i>HIST1H2BO</i> | <i>HIST1H3B</i> | <i>HIST1H3C</i>  | <i>HIST1H3D</i>  |
| <i>HIST1H3F</i>  | <i>HIST1H3G</i>  | <i>HIST1H3H</i>  | <i>HIST1H3I</i>  | <i>HIST1H4I</i>  | <i>HIST3H3</i>   | <i>HLA-A</i>     | <i>HLA-B</i>    | <i>HLA-C</i>     | <i>HLF</i>       |
| <i>HMCN1</i>     | <i>HNF1B</i>     | <i>HNRPDL</i>    | <i>HOXA11</i>    | <i>HOXA13</i>    | <i>HOXA3</i>     | <i>HOXA9</i>     | <i>HOXC13</i>   | <i>HOXD11</i>    | <i>HOXD13</i>    |
| <i>HSD3B1</i>    | <i>HSP90AA1</i>  | <i>HSP90AB1</i>  | <i>HSPA8</i>     | <i>HSPD1</i>     | <i>HSPH1</i>     | <i>ICK</i>       | <i>ICOSLG</i>   | <i>ID3</i>       | <i>IFITM3</i>    |
