# Supplementary material for: Relationship of HER2 Alteration and Microsatellite Instability Status in Colorectal Adenocarcinoma
Source: PubMed Central journal article supplement — Oncologist. 2021 May 4;26(7):e1161–70. doi: 10.1002/onco.13786 (PMC8265359; doi:10.1002/onco.13786), 2021-05-04

Supplemental Figures for:  
Relationship of HER2 alteration and MSI status in colorectal adenocarcinoma  
Qiu Miaozen et al.

Supplementary figure 1

Disease free survival (DFS) in patients with HER2 mutation and amplification (A), patients with MSS and MSI-H (B), MSI-H patients with and without HER2 alteration (C).

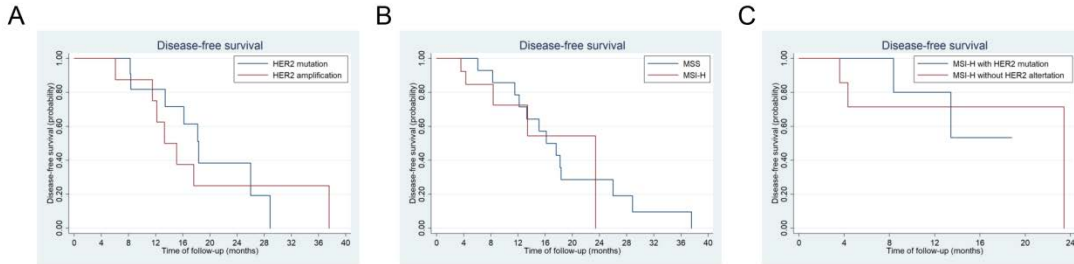

Supplementary figure 2.

Progression free survival (PFS) of first-line therapy in patients with HER2 mutation and amplification (A), MSI-H patients with and without HER2 alteration (B).

A

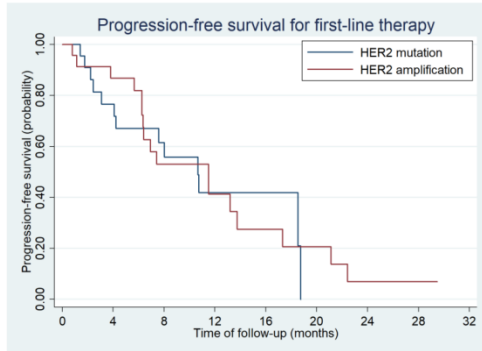

B

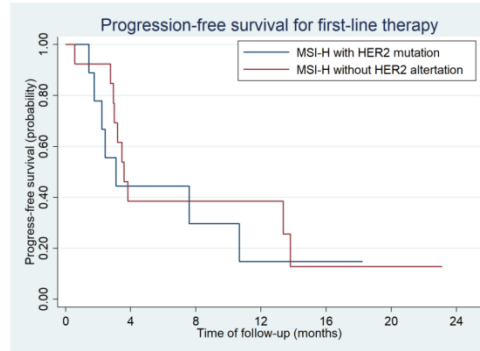

Supplement: ONCO-26-e1161-s002.pdf [file ONCO-26-e1161-s002.pdf]
